# Supplementary material
Source: MDPI journal article supplement (https://www.mdpi.com/2673-7523/3/1/1)
Supplement: s1 [file s1]

# SUPPLEMENTARY MATERIAL

**Table S1.** MEDLINE search terms.

All Ovid MEDLINE <January 1, 1995 - July 5, 2022>

| Search Item | Search Keywords                                                                                                                                                                                                                                                                                                                                                                                                                                                                                                                                                                                                                                                                                                                    |
|-------------|------------------------------------------------------------------------------------------------------------------------------------------------------------------------------------------------------------------------------------------------------------------------------------------------------------------------------------------------------------------------------------------------------------------------------------------------------------------------------------------------------------------------------------------------------------------------------------------------------------------------------------------------------------------------------------------------------------------------------------|
| 1           | (neuro-oncolog* or neurooncolog* or brain oncolog* or brain neoplasm* or brain tumour or brain cancer or neurological cancer or neurological tumour or neurological tumor or brain tumor or glioblastoma or astrocytoma or malign* tumor or glioma* or brain meta*).ti. or exp brain neoplasms/ or exp meningeal neoplasms/ or exp neuroectodermal tumors/ or exp neoplasms, nerve tissue/                                                                                                                                                                                                                                                                                                                                         |
| 2           | (MNI* or Montreal Neurological Institute or mapp* or frequency map* or heatmap* or heat map* or angle map* or standard space or common space).mp. or (connectom* or atlas or connectivity or probabilistic or spatial distribution or map*).ti,kw.                                                                                                                                                                                                                                                                                                                                                                                                                                                                                 |
| 3           | exp chordata, nonvertebrate/ or exp amphibians/ or exp birds/ or exp fishes/ or exp afrotheria/ or exp artiodactyla/ or exp carnivora/ or exp cetacea/ or exp chiroptera/ or exp eulipotyphla/ or exp lagomorpha/ or exp pangolins/ or exp perissodactyla/ or exp cercopithecidae/ or exp gorilla gorilla/ or exp neanderthals/ or exp pan paniscus/ or exp pan troglodytes/ or exp pongo/ or exp hylobatidae/ or exp platyrrhini/ or exp tarsii/ or exp strepsirhini/ or exp rodentia/ or exp scandentia/ or exp xenarthra/ or exp marsupialia/ or exp monotremata/ or exp reptiles/ or exp invertebrates/ or (canine or macaque or rodent or rat or mouse or mice or swine*).mp. or exp Pediatrics/ or (pediatric or child*).mp. |
| 4           | 1 and 2                                                                                                                                                                                                                                                                                                                                                                                                                                                                                                                                                                                                                                                                                                                            |
| 5           | 4 not 3                                                                                                                                                                                                                                                                                                                                                                                                                                                                                                                                                                                                                                                                                                                            |
| 6           | limit 5 to (english language and yr="1995 -Current")                                                                                                                                                                                                                                                                                                                                                                                                                                                                                                                                                                                                                                                                               |

\* synonyms.

**Table S2.** Articles that utilize MNI in neuro-oncology research.

| Published Year | Title                                                                                                                                                                                 | Author                       | Input                    | Output                                           | Patients |
|----------------|---------------------------------------------------------------------------------------------------------------------------------------------------------------------------------------|------------------------------|--------------------------|--------------------------------------------------|----------|
| 2022           | A novel MRI-based quantitative water content atlas of the human brain.                                                                                                                | Shah et al. <sup>1</sup>     | tumor (glioma)           | water atlas                                      | 20       |
| 2022           | Are there predilection sites for intracranial meningioma? A population-based atlas.                                                                                                   | Hosainey et al. <sup>2</sup> | tumor (meningioma)       | spatial distribution; demographics               | 602      |
| 2022           | Connectivity-based parcellation of normal and anatomically distorted human cerebral cortex.                                                                                           | Doyen et al. <sup>3</sup>    | tumor (glioma)           | method: parcellation                             | 218      |
| 2022           | Anatomical phenotyping and staging of brain tumours.                                                                                                                                  | Akeret et al. <sup>4</sup>   | tumor (general)          | spatial distribution; genetic subtype; prognosis | 1000     |
| 2021           | Improving Localization of Brain Tumors through 3D GAN Inpainting.                                                                                                                     | Weninger et al. <sup>5</sup> | tumor (general)          | method: normalization                            | N/A      |
| 2021           | Support vector machine based aphasia classification of transcranial magnetic stimulation language mapping in brain tumor patients.                                                    | Wang et al. <sup>6</sup>     | miscellaneous: rTMS      | function map: language                           | 90       |
| 2021           | Exploration of spatial distribution of brain metastasis from small cell lung cancer and identification of metastatic risk level of brain regions: a multicenter, retrospective study. | Wang et al. <sup>7</sup>     | tumor (brain metastases) | spatial distribution; primary tumor subtype      | 215      |

|      |                                                                                                                                                                                                |                                |                          |                                                                |      |
|------|------------------------------------------------------------------------------------------------------------------------------------------------------------------------------------------------|--------------------------------|--------------------------|----------------------------------------------------------------|------|
| 2021 | Planning Brain Tumor Resection Using a Probabilistic Atlas of Cortical and Subcortical Structures Critical for Functional Processing: A Proof of Concept.                                      | Sarubbo et al. <sup>8</sup>    | DES                      | method: constructing function map                              | 10   |
| 2021 | Virtual brain grafting: Enabling whole brain parcellation in the presence of large lesions.                                                                                                    | Radwan et al. <sup>9</sup>     | tumor (glioma)           | method: normalization                                          | 110  |
| 2021 | A Voxel-Based Radiographic Analysis Reveals the Biological Character of Pro-neural-Mesenchymal Transition in Glioblastoma.                                                                     | Qi et al. <sup>10</sup>        | tumor (glioma)           | spatial distribution; prognosis; genetic subtype               | 223  |
| 2021 | Surgery of Insular Diffuse Gliomas-Part 2: Probabilistic Cortico-Subcortical Atlas of Critical Eloquent Brain Structures and Probabilistic Resection Map During Transcortical Awake Resection. | Pallud et al. <sup>11</sup>    | DES                      | function map: language                                         | 61   |
| 2021 | Lesion covariance networks reveal proposed origins and pathways of diffuse gliomas.                                                                                                            | Mandal et al. <sup>12</sup>    | tumor (glioma)           | spatial distribution; miscellaneous: transcriptomics           | 410  |
| 2021 | The link between gliomas infiltration and white matter architecture investigated with electron microscopy and diffusion tensor imaging.                                                        | Latini et al. <sup>13</sup>    | tumor (glioma)           | genetic subtype; spatial distribution                          | 67   |
| 2021 | Survival of glioblastoma in relation to tumor location: a statistical tumor atlas of a population-based cohort.                                                                                | Fyllingen et al. <sup>14</sup> | tumor (glioma)           | spatial distribution; prognosis                                | 215  |
| 2021 | High-Grade Gliomas Located in the Right Hemisphere Are Associated With Worse Quality of Life.                                                                                                  | Fortin et al. <sup>15</sup>    | tumor (glioma)           | spatial distribution; prognosis                                | 53   |
| 2021 | Lesion-symptom mapping of language impairments in patients suffering from left perisylvian gliomas.                                                                                            | Fekonja et al. <sup>16</sup>   | tumor (glioma)           | spatial distribution; function map: language                   | 60   |
| 2021 | The Infratentorial Localization of Brain Metastases May Correlate with Specific Clinical Characteristics and Portend Worse Outcomes Based on Voxel-Wise Mapping.                               | Dou et al. <sup>17</sup>       | tumor (brain metastasis) | spatial distribution; demographics; genetic subtype; prognosis | 1102 |
| 2021 | Effect of brain normalization methods on the construction of functional connectomes from resting-state functional MRI in patients with gliomas.                                                | Chen et al. <sup>18</sup>      | tumor (glioma)           | method: normalization                                          | 50   |

|      |                                                                                                                                         |                                 |                                |                                                             |     |
|------|-----------------------------------------------------------------------------------------------------------------------------------------|---------------------------------|--------------------------------|-------------------------------------------------------------|-----|
| 2021 | Time-to-contact perception in the brain.                                                                                                | Baures et al. <sup>19</sup>     | DES                            | spatial distribution: function map: cognition               | 40  |
| 2020 | Mapping seizure foci and tumor genetic factors in glioma associated seizure patients.                                                   | Yunhe et al. <sup>20</sup>      | tumor (glioma)                 | spatial distribution; symptom map: seizure; genetic subtype | 119 |
| 2020 | Accurate MR Image Registration to Anatomical Reference Space for Diffuse Glioma.                                                        | Visser et al. <sup>21</sup>     | tumor (glioma)                 | method: normalization                                       | 40  |
| 2020 | Mapping distribution of brain metastases: does the primary tumor matter?.                                                               | Schroeder et al. <sup>22</sup>  | tumor (brain metastasis)       | spatial distribution; primary tumor subtype                 | 369 |
| 2020 | New insights into the neural foundations mediating movement/language interactions gained from intrasurgical direct electrostimulations. | Rech et al. <sup>23</sup>       | DES                            | function map: motor                                         | 100 |
| 2020 | Lateral or Medial Surgical Approaches for Thalamic Gliomas Resection?.                                                                  | Qinglong et al. <sup>24</sup>   | tumor (glioma)                 | spatial distribution; prognosis                             | 53  |
| 2020 | Lesion Network Mapping Analysis Identifies Potential Cause of Postoperative Depression in a Case of Cingulate Low-Grade Glioma.         | Mansouri et al. <sup>25</sup>   | resection                      | symptom map: cognitive dysfunction; spatial distribution    | 1   |
| 2020 | Genetic, cellular, and connectomic characterization of the brain regions commonly plagued by glioma.                                    | Mandal et al. <sup>26</sup>     | tumor (glioma)                 | miscellaneous: transcriptomics; spatial distribution        | 335 |
| 2020 | Alterations of white matter integrity associated with cognitive deficits in patients with glioma.                                       | Liu et al. <sup>27</sup>        | tumor (glioma)                 | symptom map: cognitive dysfunction                          | 49  |
| 2020 | Differences in the preferential location and invasiveness of diffuse low-grade gliomas and their impact on outcome.                     | Latini et al. <sup>28</sup>     | tumor (glioma)                 | spatial distribution; genetic subtype; growth pattern       | 102 |
| 2019 | Combining resting state functional MRI with intraoperative cortical stimulation to map the mentalizing network.                         | Yordanova et al. <sup>29</sup>  | et DES                         | function map: cognition                                     | 23  |
| 2019 | A low percentage of metastases in deep brain and temporal lobe structures.                                                              | Yanagihara et al. <sup>30</sup> | et tumor (brain metastasis)    | spatial distribution                                        | 277 |
| 2019 | Differences between primary central nervous system lymphoma and glioblastoma: topographic analysis using voxel-based morphometry.       | Yamashita et al. <sup>31</sup>  | et tumor (glioma and lymphoma) | spatial distribution                                        | 170 |
| 2019 | Arterial Spin Labeling for Glioma Grade Discrimination: Correlations with IDH1                                                          | Wang et al. <sup>32</sup>       | tumor (glioma)                 | perfusion map                                               | 52  |

|      |                                                                                                                                                                          |                              |                                 |                                                          |     |
|------|--------------------------------------------------------------------------------------------------------------------------------------------------------------------------|------------------------------|---------------------------------|----------------------------------------------------------|-----|
|      | Genotype and 1p/19q Status.                                                                                                                                              |                              |                                 |                                                          |     |
| 2019 | Integrated datasets of normalized brain with functional localization using intra-operative electrical stimulation.                                                       | Tamura et al. <sup>33</sup>  | DES                             | function map: language; motor; sensation                 | 13  |
| 2019 | Brain atlas for assessing the impact of tumor location on perioperative quality of life in patients with high-grade glioma: A prospective population-based cohort study. | Sagberg et al. <sup>34</sup> | tumor (glioma)                  | spatial distribution; prognosis                          | 170 |
| 2019 | MRI Atlas of IDH Wild-Type Supratentorial Glioblastoma: Probabilistic Maps of Phenotype, Management, and Outcomes.                                                       | Roux et al. <sup>35</sup>    | tumor (glioma)                  | spatial distribution; genetic subtype; prognosis         | 392 |
| 2019 | A probabilistic map of negative motor areas of the upper limb and face: a brain stimulation study.                                                                       | Rech et al. <sup>36</sup>    | DES                             | function map: motor                                      | 117 |
| 2019 | Precuneus and psychiatric manifestations: Novel neurobiological formulations through lesion based connectivity mapping of psychopathology.                               | Narasimha al. <sup>37</sup>  | et tumor (granulomatous lesion) | function map: cognition                                  | 1   |
| 2019 | Comparing Glioblastoma Surgery Decisions Between Teams Using Brain Maps of Tumor Locations, Biopsies, and Resections.                                                    | Muller et al. <sup>38</sup>  | tumor (glioma)                  | spatial distribution; prognosis                          | 275 |
| 2019 | Anterior insular cortex stimulation and its effects on emotion recognition.                                                                                              | Motomura al. <sup>39</sup>   | et DES                          | function map: cognition                                  | 18  |
| 2019 | Seed-Based Connectivity Analysis of Resting-State fMRI in Patients with Brain Tumors: A Feasibility Study.                                                               | Metwali et al. <sup>40</sup> | tumor (glioma)                  | method: constructing connectome                          | 30  |
| 2019 | Electrically induced verbal perseveration: A striatal deafferentation model.                                                                                             | Mandonnet al. <sup>41</sup>  | et DES                          | function map: language                                   | 21  |
| 2019 | Hotspots of small strokes in glioma surgery: an overlooked risk?.                                                                                                        | Loit et al. <sup>42</sup>    | tumor infarcts                  | spatial distribution; infarct map; prognosis             | 150 |
| 2019 | A novel radiological classification system for cerebral gliomas: The Brain-Grid.                                                                                         | Latini et al. <sup>43</sup>  | tumor (glioma)                  | miscellaneous: classification system                     | 39  |
| 2019 | Association between tumor location and neurocognitive functioning using tumor localization maps.                                                                         | Habets et al. <sup>44</sup>  | tumor (glioma)                  | spatial distribution; symptom map: cognitive dysfunction | 72  |
| 2019 | Lesion symptom mapping at the regional level in patients with a meningioma.                                                                                              | De et al. <sup>45</sup>      | tumor (meningioma)              | function map: cognition                                  | 224 |

|      |                                                                                                                                                                    |                                 |                          |                                                         |     |
|------|--------------------------------------------------------------------------------------------------------------------------------------------------------------------|---------------------------------|--------------------------|---------------------------------------------------------|-----|
| 2019 | Dissociating motor-speech from lexico-semantic systems in the left frontal lobe: insight from a series of 17 awake intraoperative mappings in glioma patients.     | Corrivetti et al. <sup>46</sup> | DES                      | function map: language                                  | 17  |
| 2018 | Regional specificity of 1p/19q co-deletion combined with radiological features for predicting the survival outcomes of anaplastic oligodendroglial tumor patients. | Wang et al. <sup>47</sup>       | tumor (glioma)           | spatial distribution; genetic subtype; prognosis        | 206 |
| 2018 | Voxel-wise radiogenomic mapping of tumor location with key molecular alterations in patients with glioma.                                                          | Tejada et al. <sup>48</sup>     | tumor (glioma)           | spatial distribution; genetic subtype                   | 368 |
| 2018 | Multi-Atlas Segmentation of MR Tumor Brain Images Using Low-Rank Based Image Recovery.                                                                             | Tang et al. <sup>49</sup>       | tumor (general)          | method: segmentation                                    | N/A |
| 2018 | Object-action dissociation: A voxel-based lesion-symptom mapping study on 102 patients after glioma removal.                                                       | Pisoni et al. <sup>50</sup>     | tumor (general)          | spatial distribution; symptom map: language dysfunction | 102 |
| 2018 | Voxel-based lesion mapping of meningioma: a comprehensive lesion location mapping of 260 lesions.                                                                  | Hirayama et al. <sup>51</sup>   | tumor (meningioma)       | spatial distribution                                    | 260 |
| 2018 | Regional specificity of matrix metalloproteinase-9 expression in the brain: voxel-level mapping in primary glioblastomas.                                          | Fan et al. <sup>52</sup>        | tumor (glioma)           | spatial distribution; genetic subtype                   | 133 |
| 2018 | The Direction of Tumour Growth in Glioblastoma Patients.                                                                                                           | Esmaeili et al. <sup>53</sup>   | tumor (glioma)           | spatial distribution; growth pattern                    | 56  |
| 2018 | Seizure-susceptible brain regions in glioblastoma: identification of patients at risk.                                                                             | Cayuela et al. <sup>54</sup>    | tumor (glioma)           | spatial distribution; symptom map: seizure              | 391 |
| 2017 | Anatomical location differences between mutated and wild-type isocitrate dehydrogenase 1 in low-grade gliomas.                                                     | Yu et al. <sup>55</sup>         | tumor (glioma)           | spatial distribution; genetic subtype                   | 92  |
| 2017 | Neural pathways subserving face-based mentalizing.                                                                                                                 | Yordanova et al. <sup>56</sup>  | et DES                   | function map: cognition; spatial distribution           | 27  |
| 2017 | Groupwise registration of MR brain images with tumors.                                                                                                             | Tang et al. <sup>57</sup>       | tumor (general)          | method: normalization                                   | N/A |
| 2017 | Automated white matter fiber tract identification in patients with brain tumors.                                                                                   | O'Donnell et al. <sup>58</sup>  | et tumor (general)       | method: constructing connectome                         | 18  |
| 2017 | Subtypes of breast cancer show different spatial distributions of brain metastases.                                                                                | Kyeong et al. <sup>59</sup>     | tumor (brain metastasis) | spatial distribution; primary tumor subtype             | 100 |

|      |                                                                                                                                                                                                                         |                                |                 |                                                                                |     |
|------|-------------------------------------------------------------------------------------------------------------------------------------------------------------------------------------------------------------------------|--------------------------------|-----------------|--------------------------------------------------------------------------------|-----|
| 2017 | Connectomic profile and clinical phenotype in newly diagnosed glioma patients.                                                                                                                                          | Derks et al. <sup>60</sup>     | tumor (glioma)  | prognosis; spatial distribution                                                | 90  |
| 2017 | IDH mutation and 1p19q codeletion distinguish two radiological patterns of diffuse low-grade gliomas.                                                                                                                   | Darlix et al. <sup>61</sup>    | tumor (glioma)  | spatial distribution; genetic subtype                                          | 198 |
| 2017 | Stereotactic probability and variability of speech arrest and anomia sites during stimulation mapping of the language dominant hemisphere.                                                                              | Chang et al. <sup>62</sup>     | DES             | spatial distribution; function map: language                                   | 102 |
| 2017 | Addressing the selective role of distinct prefrontal areas in response suppression: A study with brain tumor patients.                                                                                                  | Arbula et al. <sup>63</sup>    | tumor (general) | spatial distribution; cognition                                                | 37  |
| 2016 | Mapping genetic factors in high-grade glioma patients.                                                                                                                                                                  | Yuan et al. <sup>64</sup>      | tumor (glioma)  | spatial distribution; genetic subtype; prognosis                               | 65  |
| 2016 | Computational Identification of Tumor Anatomic Location Associated with Survival in 2 Large Cohorts of Human Primary Glioblastomas.                                                                                     | Liu et al. <sup>65</sup>       | tumor (glioma)  | spatial distribution; prognosis                                                | 384 |
| 2016 | Chronic spatial working memory deficit associated with the superior longitudinal fasciculus: a study using voxel-based lesion-symptom mapping and intraoperative direct stimulation in right prefrontal glioma surgery. | Kinoshita et al. <sup>66</sup> | DES             | spatial distribution; function map: cognition                                  | 24  |
| 2016 | Connectome analysis for pre-operative brain mapping in neurosurgery.                                                                                                                                                    | Hart et al. <sup>67</sup>      | tumor (glioma)  | miscellaneous: constructed connectome; spatial distribution                    | 5   |
| 2016 | Anatomical specificity of vascular endothelial growth factor expression in glioblastomas: a voxel-based mapping analysis.                                                                                               | Fan et al. <sup>68</sup>       | tumor (glioma)  | spatial distribution; genetic subtype                                          | 209 |
| 2016 | Inhibition processes are dissociable and lateralized in human prefrontal cortex.                                                                                                                                        | Cipolotti et al. <sup>69</sup> | tumor (other)   | spatial distribution: symptom map: language dysfunction, cognitive dysfunction | 164 |
| 2016 | Population-based MRI atlases of spatial distribution are specific to patient and tumor characteristics in glioblastoma.                                                                                                 | Bilello et al. <sup>70</sup>   | tumor (glioma)  | spatial distribution; demographics                                             | 206 |
| 2016 | Neurovascular uncoupling in resting state fMRI demonstrated in patients with primary brain gliomas.                                                                                                                     | Agarwal et al. <sup>71</sup>   | tumor (glioma)  | perfusion map                                                                  | 7   |

|      |                                                                                                                                                                                               |                                |                 |                                                |     |
|------|-----------------------------------------------------------------------------------------------------------------------------------------------------------------------------------------------|--------------------------------|-----------------|------------------------------------------------|-----|
| 2015 | Direct evidence from intraoperative electrocortical stimulation indicates shared and distinct speech production center between Chinese and English languages.                                 | Wu et al. <sup>72</sup>        | DES             | spatial map; function map: language            | 66  |
| 2015 | Transient aphasias after left hemisphere resective surgery.                                                                                                                                   | Wilson et al. <sup>73</sup>    | resection       | spatial map; symptom map: language dysfunction | 110 |
| 2015 | The role of the corpus callosum in seizure spread: MRI lesion mapping in oligodendrogliomas.                                                                                                  | Wieshmann et al. <sup>74</sup> | tumor (other)   | spatial map; symptom map: seizure              | 21  |
| 2015 | Localizing seizure-susceptible brain regions associated with low-grade gliomas using voxel-based lesion-symptom mapping.                                                                      | Wang et al. <sup>75</sup>      | tumor (glioma)  | spatial map; symptom map: seizure              | 410 |
| 2015 | Age-associated brain regions in gliomas: a volumetric analysis.                                                                                                                               | Wang et al. <sup>76</sup>      | tumor (glioma)  | spatial map; demographics; prognosis           | 400 |
| 2015 | Anatomical localization of isocitrate dehydrogenase 1 mutation: a voxel-based radiographic study of 146 low-grade gliomas.                                                                    | Wang et al. <sup>77</sup>      | tumor (glioma)  | spatial map; genetic subtype; prognosis        | 146 |
| 2015 | Mapping p53 mutations in low-grade glioma: a voxel-based neuroimaging analysis.                                                                                                               | Wang et al. <sup>78</sup>      | tumor (glioma)  | spatial map; genetic subtype; prognosis        | 182 |
| 2015 | Towards a functional atlas of human white matter.                                                                                                                                             | Sarubbo et al. <sup>79</sup>   | DES             | constructed connectome                         | 130 |
| 2015 | The neural network associated with lexical-semantic knowledge about social groups.                                                                                                            | Piretti et al. <sup>80</sup>   | tumor (other)   | function map: cognition                        | 20  |
| 2015 | Expert-validated CSF segmentation of MNI atlas enhances accuracy of virtual glioma growth patterns.                                                                                           | Amelot et al. <sup>81</sup>    | tumor (glioma)  | growth pattern                                 | N/A |
| 2014 | Anatomical localization of p53 mutated tumors: A radiographic study of human glioblastomas.                                                                                                   | Zhang et al. <sup>82</sup>     | tumor (glioma)  | spatial distribution; genetic subtype          | 163 |
| 2014 | Regional and voxel-wise comparisons of blood flow measurements between dynamic susceptibility contrast magnetic resonance imaging (DSC-MRI) and arterial spin labeling (ASL) in brain tumors. | White et al. <sup>83</sup>     | tumor (general) | perfusion map                                  | 30  |
| 2014 | Identifying radiographic specificity for phosphatase and tensin homolog and epidermal growth factor receptor                                                                                  | Wang et al. <sup>84</sup>      | tumor (glioma)  | spatial distribution; genetic subtype          | 140 |

|      |                                                                                                                                                                           |                                |                             |                                                          |     |  |
|------|---------------------------------------------------------------------------------------------------------------------------------------------------------------------------|--------------------------------|-----------------------------|----------------------------------------------------------|-----|--|
|      | changes: a quantitative analysis of glioblastomas.                                                                                                                        |                                |                             |                                                          |     |  |
| 2014 | Anatomical specificity of O6-methylguanine DNA methyltransferase protein expression in glioblastomas.                                                                     | Wang et al. <sup>85</sup>      | tumor (glioma)              | spatial distribution; genetic subtype                    | 218 |  |
| 2014 | Probabilistic map of critical functional regions of the human cerebral cortex: Broca's area revisited.                                                                    | Tate et al. <sup>86</sup>      | DES                         | spatial distribution; function map: language             | 165 |  |
| 2014 | Inverse spatial distribution of brain metastases and white matter hyperintensities in advanced lung and non-lung cancer patients.                                         | Quattrocchi al. <sup>87</sup>  | et tumor (brain metastasis) | spatial distribution; primary tumor subtype              | 200 |  |
| 2014 | Different spatial distribution between germinal center B and non-germinal center B primary central nervous system lymphoma revealed by magnetic resonance group analysis. | Kinoshita et al. <sup>88</sup> | tumor (lymphoma)            | spatial distribution                                     | 100 |  |
| 2014 | Differentiation of edema and glioma infiltration: proposal of a DTI-based probability map.                                                                                | Hoefnagels al. <sup>89</sup>   | et tumor (glioma)           | spatial distribution; growth pattern                     | 22  |  |
| 2014 | Impact of brain tumour location on emotion and personality: a voxel-based lesion-symptom mapping study on mentalization processes.                                        | Campanella al. <sup>90</sup>   | et resection cavity         | spatial distribution; symptom map: cognitive dysfunction | 71  |  |
| 2013 | Probabilistic radiographic atlas of glioblastoma phenotypes.                                                                                                              | Ellingson et al. <sup>91</sup> | tumor (glioma)              | spatial distribution; genetic subtype; prognosis         | 507 |  |
| 2012 | Segregation of lexical and sub-lexical reading processes in the left perisylvian cortex.                                                                                  | Roux et al. <sup>92</sup>      | DES                         | function map: language                                   | 14  |  |
| 2012 | Spatial brain distribution of intra-axial metastatic lesions in breast and lung cancer patients.                                                                          | Quattrocchi al. <sup>93</sup>  | et tumor (brain metastasis) | spatial distribution; primary tumor subtype              | 114 |  |
| 2012 | Higher incidence of epilepsy in meningiomas located on the premotor cortex: a voxel-wise statistical analysis.                                                            | Hamasaki al. <sup>94</sup>     | et tumor (meningioma)       | spatial distribution; symptom map: seizure               | 688 |  |
| 2011 | Evidence for potentials and limitations of brain plasticity using an atlas of functional resectability of WHO grade II gliomas: towards a "minimal common brain".         | Ius et al. <sup>95</sup>       | DES                         | spatial distribution; function map: other                | 58  |  |
| 2008 | Automated fiber tracking of human brain white matter using diffusion tensor imaging.                                                                                      | Zhang et al. <sup>96</sup>     | tumor (general)             | method: constructing connectome                          | 10  |  |



|      |                                                                                                                                 |                                   |                 |                                              |     |
|------|---------------------------------------------------------------------------------------------------------------------------------|-----------------------------------|-----------------|----------------------------------------------|-----|
| 2007 | Preoperative estimation of residual volume for WHO grade II glioma resected with intraoperative functional mapping.             | Mandonnet et al. <sup>97</sup>    | et DES          | spatial distribution; function map: language | 65  |
| 2007 | A novel approach to clinical-radiological correlations: Anatomico-Clinical Overlapping Maps (AnaCOM): method and validation.    | Kinkingnehun et al. <sup>98</sup> | tumor (general) | spatial distribution; function map: language | 64  |
| 2005 | Incorporating statistical measures of anatomical variability in atlas-to-subject registration for conformal brain radiotherapy. | Commowick et al. <sup>99</sup>    | tumor (general) | method: segmentation                         | N/A |
| 2003 | Combined functional MRI and tractography to demonstrate the connectivity of the human primary motor cortex in vivo.             | Guye et al. <sup>100</sup>        | tumor (general) | method: constructing connectome              | 9   |
| 2001 | Spatial normalization of brain images with focal lesions using cost function masking.                                           | Brett et al. <sup>101</sup>       | tumor (general) | method: normalization                        | N/A |

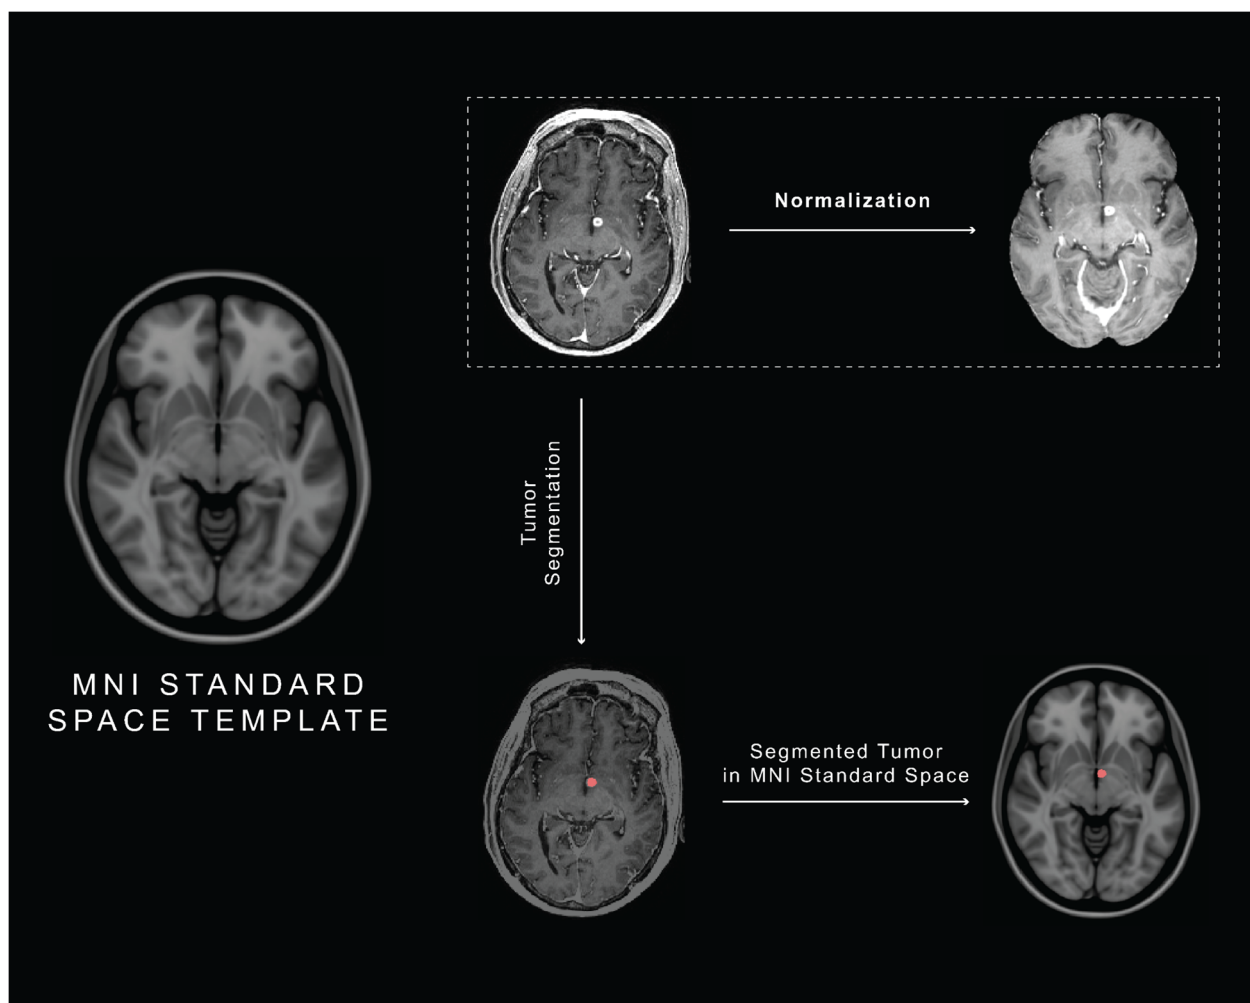

**Figure S1. Normalization of brain tumor MRI to the Montreal Neurological Institute (MNI) common space template.** Adapted with permission from Untapped Neuroimaging Tools for Neuro-Oncology: Connectomics and Spatial Transcriptomics (Jurgen et al., 2022)<sup>102</sup>.

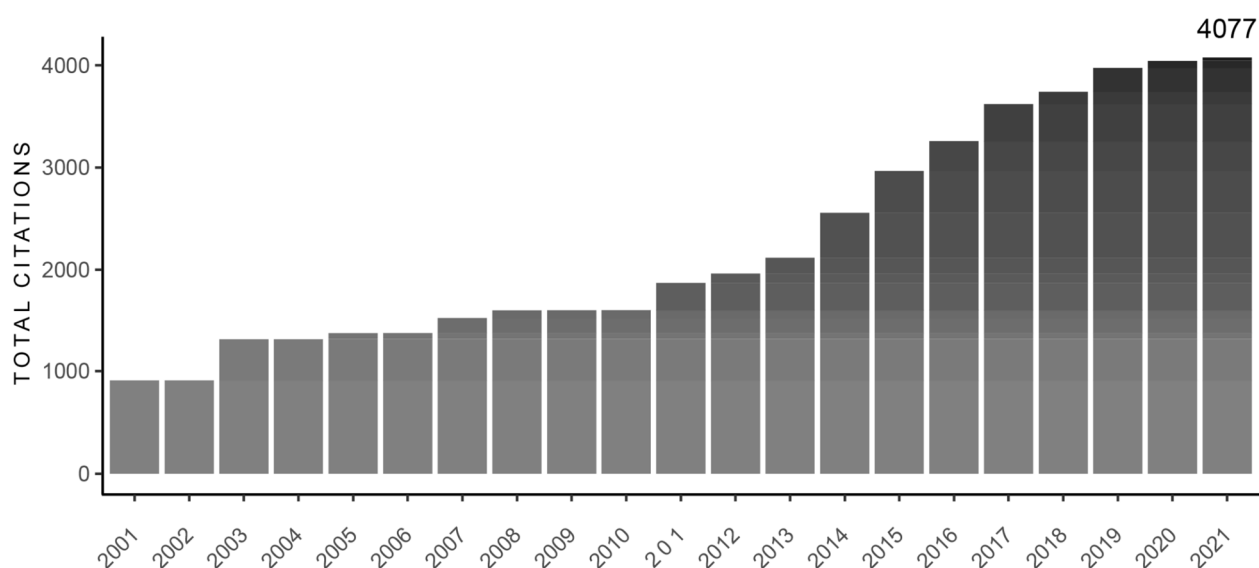

**Figure S2. Cumulative citations over time.**

## REFERENCES

- Shah: N. J., Abbas, Z., Ridder, D., Zimmermann, M. & Oros-Peusquens, A.-M. A novel MRI-based quantitative water content atlas of the human brain. *NeuroImage* **252**, 119014 (2022).
- Hosainey, S. A. M. *et al.* Are there predilection sites for intracranial meningioma? A population-based atlas. *Neurosurgical review* **45**, 1543–1552 (2022).
- Doyen, S. *et al.* Connectivity-based parcellation of normal and anatomically distorted human cerebral cortex. *Hum Brain Mapp* **43**, 1358–1369 (2022).
- Akeret, K. *et al.* Anatomical phenotyping and staging of brain tumours. *Brain : a journal of neurology* **145**, 1162–1176 (2022).
- Weninger, L., Gilerson, A. & Merhof, D. Improving Localization of Brain Tumors through 3D GAN Inpainting. *Annu Int Conf IEEE Eng Med Biol Soc* **2021**, 2651–2654 (2021).
- Wang, Z. *et al.* Support vector machine based aphasia classification of transcranial magnetic stimulation language mapping in brain tumor patients. *NeuroImage. Clinical* **29**, 102536 (2021).
- Wang, Y. *et al.* Exploration of spatial distribution of brain metastasis from small cell lung cancer and identification of metastatic risk level of brain regions: a multicenter, retrospective study. *Cancer imaging : the official publication of the International Cancer Imaging Society* **21**, 41 (2021).
- Sarubbo, S. *et al.* Planning Brain Tumor Resection Using a Probabilistic Atlas of Cortical and Subcortical Structures Critical for Functional Processing: A Proof of Concept. *Oper Neurosurg (Hagerstown)* **20**, E175–E183 (2021).
- Radwan, A. M. *et al.* Virtual brain grafting: Enabling whole brain parcellation in the presence of large lesions. *Neuroimage* **229**, 117731 (2021).
- Qi, T. *et al.* A Voxel-Based Radiographic Analysis Reveals the Biological Character of Proneural-Mesenchymal Transition in Glioblastoma. *Frontiers in oncology* **11**, 595259 (2021).
- Pallud, J. *et al.* Surgery of Insular Diffuse Gliomas—Part 2: Probabilistic Cortico-Subcortical Atlas of Critical Eloquent Brain Structures and Probabilistic Resection Map During Transcortical Awake Resection. *Neurosurgery* **89**, 579–590 (2021).
- Mandal, A. S. *et al.* Lesion covariance networks reveal proposed origins and pathways of diffuse gliomas. *Brain communications* **3**, fcab289 (2021).
- Latini, F. *et al.* The link between gliomas infiltration and white matter architecture investigated with electron microscopy and diffusion tensor imaging. *Neuroimage Clin* **31**, 102735 (2021).
- Fyllingen, E. H. *et al.* Survival of glioblastoma in relation to tumor location: a statistical tumor atlas of a population-based cohort. *Acta neurochirurgica* **163**, 1895–1905 (2021).
- Fortin, D. *et al.* High-Grade Gliomas Located in the Right Hemisphere Are Associated With Worse Quality of Life. *World neurosurgery* **149**, e721–e728 (2021).
- Fekonja, L. S. *et al.* Lesion-symptom mapping of language impairments in patients suffering from left perisylvian gliomas. *Cortex; a journal devoted to the study of the nervous system and behavior* **144**, 1–14 (2021).
- Dou, Z. *et al.* The Infratentorial Localization of Brain Metastases May Correlate with Specific Clinical Characteristics and Portend Worse Outcomes Based on Voxel-Wise Mapping. *Cancers* **13**, (2021).
- Chen, H. S.-M. *et al.* Effect of brain normalization methods on the construction of functional connectomes from resting-state functional MRI in patients with gliomas. *Magn Reson Med* **86**, 487–498 (2021).

19. Baures, R. *et al.* Time-to-contact perception in the brain. *Journal of neuroscience research* **99**, 455–466 (2021).
20. Yunhe, M., Yuan, Y., Xiang, W., Yanhui, L. & Qing, M. Mapping seizure foci and tumor genetic factors in glioma associated seizure patients. *Journal of neurosurgical sciences* **64**, 456–463 (2020).
21. Visser, M. *et al.* Accurate MR Image Registration to Anatomical Reference Space for Diffuse Glioma. *Front Neurosci* **14**, 585 (2020).
22. Schroeder, T. *et al.* Mapping distribution of brain metastases: does the primary tumor matter?. *Journal of neuro-oncology* **147**, 229–235 (2020).
23. Rech, F., Wassermann, D. & Duffau, H. New insights into the neural foundations mediating movement/language interactions gained from intrasurgical direct electrostimulations. *Brain and Cognition* **142**, 105583 (2020).
24. Qinglong, G. *et al.* Lateral or Medial Surgical Approaches for Thalamic Gliomas Resection?. *World neurosurgery* **136**, e90–e107 (2020).
25. Mansouri, A. *et al.* Lesion Network Mapping Analysis Identifies Potential Cause of Postoperative Depression in a Case of Cingulate Low-Grade Glioma. *World Neurosurg* **133**, 278–282 (2020).
26. Mandal, A. S., Romero-Garcia, R., Hart, M. G. & Suckling, J. Genetic, cellular, and connectomic characterization of the brain regions commonly plagued by glioma. *Brain : a journal of neurology* **143**, 3294–3307 (2020).
27. Liu, D. *et al.* Alterations of white matter integrity associated with cognitive deficits in patients with glioma. *Brain and behavior* **10**, e01639 (2020).
28. Latini, F., Fahlstrom, M., Hesselager, G., Zetterling, M. & Ryttefors, M. Differences in the preferential location and invasiveness of diffuse low-grade gliomas and their impact on outcome. *Cancer medicine* **9**, 5446–5458 (2020).
29. Yordanova, Y. N., Cochereau, J., Duffau, H. & Herbet, G. Combining resting state functional MRI with intraoperative cortical stimulation to map the mentalizing network. *Neuroimage* **186**, 628–636 (2019).
30. Yanagihara, T. K. *et al.* A low percentage of metastases in deep brain and temporal lobe structures. *Neuro-oncology* **21**, 640–647 (2019).
31. Yamashita, K. *et al.* Differences between primary central nervous system lymphoma and glioblastoma: topographic analysis using voxel-based morphometry. *Clinical radiology* **74**, 816.e1–816.e8 (2019).
32. Wang, N., Xie, S.-Y., Liu, H.-M., Chen, G.-Q. & Zhang, W.-D. Arterial Spin Labeling for Glioma Grade Discrimination: Correlations with IDH1 Genotype and 1p/19q Status. *Translational oncology* **12**, 749–756 (2019).
33. Tamura, M. *et al.* Integrated datasets of normalized brain with functional localization using intra-operative electrical stimulation. *International journal of computer assisted radiology and surgery* **14**, 2109–2122 (2019).
34. Sagberg, L. M. *et al.* Brain atlas for assessing the impact of tumor location on perioperative quality of life in patients with high-grade glioma: A prospective population-based cohort study. *NeuroImage. Clinical* **21**, 101658 (2019).
35. Roux, A. *et al.* MRI Atlas of IDH Wild-Type Supratentorial Glioblastoma: Probabilistic Maps of Phenotype, Management, and Outcomes. *Radiology* **293**, 633–643 (2019).
36. Rech, F. *et al.* A probabilistic map of negative motor areas of the upper limb and face: a brain stimulation study. *Brain : a journal of neurology* **142**, 952–965 (2019).
37. Narasimha, V. L., Basavaraju, R., Mangalore, S. & Mehta, U. M. Precuneus and psychiatric manifestations: Novel neurobiological formulations through lesion based connectivity mapping of psychopathology. *Asian journal of psychiatry* **39**, 98–100 (2019).
38. Muller, D. M. J. *et al.* Comparing Glioblastoma Surgery Decisions Between Teams Using Brain Maps of Tumor Locations, Biopsies, and Resections. *JCO clinical cancer informatics* **3**, 1–12 (2019).
39. Motomura, K. *et al.* Anterior insular cortex stimulation and its effects on emotion recognition. *Brain structure & function* **224**, 2167–2181 (2019).
40. Metwali, H. & Samii, A. Seed-Based Connectivity Analysis of Resting-State fMRI in Patients with Brain Tumors: A Feasibility Study. *World neurosurgery* **128**, e165–e176 (2019).
41. Mandonnet, E. *et al.* Electrically induced verbal perseveration: A striatal deafferentation model. *Neurology* **92**, e613–e621 (2019).
42. Loit, M.-P. *et al.* Hotspots of small strokes in glioma surgery: an overlooked risk? *Acta Neurochir (Wien)* **161**, 91–98 (2019).
43. Latini, F. *et al.* A novel radiological classification system for cerebral gliomas: The Brain-Grid. *PloS one* **14**, e0211243 (2019).
44. Habets, E. J. J. *et al.* Association between tumor location and neurocognitive functioning using tumor localization maps. *Journal of neuro-oncology* **144**, 573–582 (2019).
45. De Baene, W. *et al.* Lesion symptom mapping at the regional level in patients with a meningioma. *Neuropsychology* **33**, 103–110 (2019).
46. Corrivetti, F. *et al.* Dissociating motor-speech from lexico-semantic systems in the left frontal lobe: insight from a series of 17 awake intraoperative mappings in glioma patients. *Brain structure & function* **224**, 1151–1165 (2019).
47. Wang, K. *et al.* Regional specificity of 1p/19q co-deletion combined with radiological features for predicting the survival outcomes of anaplastic oligodendroglial tumor patients. *Journal of neuro-oncology* **136**, 523–531 (2018).
48. Tejada Neyra, M. A. *et al.* Voxel-wise radiogenomic mapping of tumor location with key molecular alterations in patients with glioma. *Neuro-oncology* **20**, 1517–1524 (2018).
49. Tang, Z., Ahmad, S., Yap, P.-T. & Shen, D. Multi-Atlas Segmentation of MR Tumor Brain Images Using Low-Rank Based Image Recovery. *IEEE Trans Med Imaging* **37**, 2224–2235 (2018).
50. Pisoni, A. *et al.* Object-action dissociation: A voxel-based lesion-symptom mapping study on 102 patients after glioma removal. *NeuroImage. Clinical* **18**, 986–995 (2018).
51. Hirayama, R. *et al.* Voxel-based lesion mapping of meningioma: a comprehensive lesion location mapping of 260 lesions. *Journal of neurosurgery* **128**, 1707–1712 (2018).

52. Fan, X. *et al.* Regional specificity of matrix metalloproteinase-9 expression in the brain: voxel-level mapping in primary glioblastomas. *Clinical radiology* **73**, 283–289 (2018).
53. Esmaeili, M., Stensjoen, A. L., Berntsen, E. M., Solheim, O. & Reinertsen, I. The Direction of Tumour Growth in Glioblastoma Patients. *Scientific reports* **8**, 1199 (2018).
54. Cayuela, N. *et al.* Seizure-susceptible brain regions in glioblastoma: identification of patients at risk. *European journal of neurology* **25**, 387–394 (2018).
55. Yu, J. *et al.* Anatomical location differences between mutated and wild-type isocitrate dehydrogenase 1 in low-grade gliomas. *The International journal of neuroscience* **127**, 873–880 (2017).
56. Yordanova, Y. N., Duffau, H. & Herbet, G. Neural pathways subserving face-based mentalizing. *Brain structure & function* **222**, 3087–3105 (2017).
57. Tang, Z., Wu, Y. & Fan, Y. Groupwise registration of MR brain images with tumors. *Phys Med Biol* **62**, 6853–6868 (2017).
58. O'Donnell, L. J. *et al.* Automated white matter fiber tract identification in patients with brain tumors. *Neuroimage Clin* **13**, 138–153 (2017).
59. Kyeong, S. *et al.* Subtypes of breast cancer show different spatial distributions of brain metastases. *PLoS One* **12**, e0188542 (2017).
60. Derks, J. *et al.* Connectomic profile and clinical phenotype in newly diagnosed glioma patients. *Neuroimage Clin* **14**, 87–96 (2017).
61. Darlix, A. *et al.* IDH mutation and 1p19q codeletion distinguish two radiological patterns of diffuse low-grade gliomas. *Journal of neuro-oncology* **133**, 37–45 (2017).
62. Chang, E. F. *et al.* Stereotactic probability and variability of speech arrest and anomia sites during stimulation mapping of the language dominant hemisphere. *Journal of neurosurgery* **126**, 114–121 (2017).
63. Arbula, S. *et al.* Addressing the selective role of distinct prefrontal areas in response suppression: A study with brain tumor patients. *Neuropsychologia* **100**, 120–130 (2017).
64. Yuan, Y. *et al.* Mapping genetic factors in high-grade glioma patients. *Clinical neurology and neurosurgery* **150**, 159–163 (2016).
65. Computational Identification of Tumor Anatomic Location Associated with Survival in 2 Large Cohorts of Human Primary Glioblastomas. Liu *et al.* (2016).
66. Kinoshita, M. *et al.* Chronic spatial working memory deficit associated with the superior longitudinal fasciculus: a study using voxel-based lesion-symptom mapping and intraoperative direct stimulation in right prefrontal glioma surgery. *Journal of neurosurgery* **125**, 1024–1032 (2016).
67. Hart, M. G., Price, S. J. & Suckling, J. Connectome analysis for pre-operative brain mapping in neurosurgery. *Br J Neurosurg* **30**, 506–517 (2016).
68. Fan, X. *et al.* Anatomical specificity of vascular endothelial growth factor expression in glioblastomas: a voxel-based mapping analysis. *Neuroradiology* **58**, 69–75 (2016).
69. Cipolotti, L. *et al.* Inhibition processes are dissociable and lateralized in human prefrontal cortex. *Neuropsychologia* **93**, 1–12 (2016).
70. Bilello, M. *et al.* Population-based MRI atlases of spatial distribution are specific to patient and tumor characteristics in glioblastoma. *NeuroImage. Clinical* **12**, 34–40 (2016).
71. Agarwal, S., Sair, H. I., Yahyavi-Firouz-Abadi, N., Airan, R. & Pillai, J. J. Neurovascular uncoupling in resting state fMRI demonstrated in patients with primary brain gliomas. *Journal of magnetic resonance imaging : JMIR* **43**, 620–6 (2016).
72. Wu, J. *et al.* Direct evidence from intraoperative electrocortical stimulation indicates shared and distinct speech production center between Chinese and English languages. *Human brain mapping* **36**, 4972–85 (2015).
73. Wilson, S. M. *et al.* Transient aphasia after left hemisphere resective surgery. *J Neurosurg* **123**, 581–593 (2015).
74. Wiesmann, U. C. *et al.* The role of the corpus callosum in seizure spread: MRI lesion mapping in oligodendrogliomas. *Epilepsy research* **109**, 126–33 (2015).
75. Wang, Y. *et al.* Localizing seizure-susceptible brain regions associated with low-grade gliomas using voxel-based lesion-symptom mapping. *Neuro-oncology* **17**, 282–8 (2015).
76. Wang, Y. *et al.* Age-associated brain regions in gliomas: a volumetric analysis. *Journal of neuro-oncology* **123**, 299–306 (2015).
77. Wang, Y. *et al.* Anatomical localization of isocitrate dehydrogenase 1 mutation: a voxel-based radiographic study of 146 low-grade gliomas. *European journal of neurology* **22**, 348–54 (2015).
78. Wang, Y. Y. *et al.* Mapping p53 mutations in low-grade glioma: a voxel-based neuroimaging analysis. *AJNR. American journal of neuroradiology* **36**, 70–6 (2015).
79. Sarubbo, S. *et al.* Towards a functional atlas of human white matter. *Human brain mapping* **36**, 3117–36 (2015).
80. Piretti, L. *et al.* The neural network associated with lexical-semantic knowledge about social groups. *Cortex; a journal devoted to the study of the nervous system and behavior* **70**, 155–68 (2015).
81. Amelot, A. *et al.* Expert-validated CSF segmentation of MNI atlas enhances accuracy of virtual glioma growth patterns. *Journal of neuro-oncology* **121**, 381–7 (2015).
82. Zhang, T. *et al.* Anatomical localization of p53 mutated tumors: A radiographic study of human glioblastomas. *Journal of the neurological sciences* **346**, 94–8 (2014).
83. White, C. M. *et al.* Regional and voxel-wise comparisons of blood flow measurements between dynamic susceptibility contrast magnetic resonance imaging (DSC-MRI) and arterial spin labeling (ASL) in brain tumors. *Journal of neuroimaging : official journal of the American Society of Neuroimaging* **24**, 23–30 (2014).
84. Wang, Y. *et al.* Identifying radiographic specificity for phosphatase and tensin homolog and epidermal growth factor receptor changes: a quantitative analysis of glioblastomas. *Neuroradiology* **56**, 1113–20 (2014).

85. Wang, Y. *et al.* Anatomical specificity of O6-methylguanine DNA methyltransferase protein expression in glioblastomas. *Journal of neuro-oncology* **120**, 331–7 (2014).
86. Tate, M. C., Herbet, G., Moritz-Gasser, S., Tate, J. E. & Duffau, H. Probabilistic map of critical functional regions of the human cerebral cortex: Broca's area revisited. *Brain : a journal of neurology* **137**, 2773–82 (2014).
87. Quattrocchi, C. C. *et al.* Inverse spatial distribution of brain metastases and white matter hyperintensities in advanced lung and non-lung cancer patients. *Journal of neuro-oncology* **120**, 321–30 (2014).
88. Kinoshita, M. *et al.* Different spatial distribution between germinal center B and non-germinal center B primary central nervous system lymphoma revealed by magnetic resonance group analysis. *Neuro-oncology* **16**, 728–34 (2014).
89. Hoefnagels, F. W. A. *et al.* Differentiation of edema and glioma infiltration: proposal of a DTI-based probability map. *Journal of neuro-oncology* **120**, 187–98 (2014).
90. Campanella, F., Shallice, T., Ius, T., Fabbro, F. & Skrap, M. Impact of brain tumour location on emotion and personality: a voxel-based lesion-symptom mapping study on mentalization processes. *Brain* **137**, 2532–2545 (2014).
91. Ellingson, B. M. *et al.* Probabilistic Radiographic Atlas of Glioblastoma Phenotypes. *AJNR Am J Neuroradiol* **34**, 533–540 (2013).
92. Roux, F.-E. *et al.* Segregation of lexical and sub-lexical reading processes in the left perisylvian cortex. *PloS one* **7**, e50665 (2012).
93. Quattrocchi, C. C. *et al.* Spatial brain distribution of intra-axial metastatic lesions in breast and lung cancer patients. *Journal of neuro-oncology* **110**, 79–87 (2012).
94. Hamasaki, T. *et al.* Higher incidence of epilepsy in meningiomas located on the premotor cortex: a voxel-wise statistical analysis. *Acta neurochirurgica* **154**, 2241–9 (2012).
95. Ius, T., Angelini, E., Thiebaut de Schotten, M., Mandonnet, E. & Duffau, H. Evidence for potentials and limitations of brain plasticity using an atlas of functional resectability of WHO grade II gliomas: towards a 'minimal common brain'. *NeuroImage* **56**, 992–1000 (2011).
96. Zhang, W., Olivi, A., Hertig, S. J., van Zijl, P. & Mori, S. Automated fiber tracking of human brain white matter using diffusion tensor imaging. *Neuroimage* **42**, 771–777 (2008).
97. Mandonnet, E. *et al.* Preoperative estimation of residual volume for WHO grade II glioma resected with intraoperative functional mapping. *Neuro-oncology* **9**, 63–9 (2007).
98. Kinkingnehun, S. *et al.* A novel approach to clinical-radiological correlations: Anatomico-Clinical Overlapping Maps (AnaCOM): method and validation. *NeuroImage* **37**, 1237–49 (2007).
99. Commowick, O. *et al.* Incorporating statistical measures of anatomical variability in atlas-to-subject registration for conformal brain radiotherapy. *Medical image computing and computer-assisted intervention : MICCAI ... International Conference on Medical Image Computing and Computer-Assisted Intervention* **8**, 927–34 (2005).
100. Guye, M. *et al.* Combined functional MRI and tractography to demonstrate the connectivity of the human primary motor cortex in vivo. *Neuroimage* **19**, 1349–1360 (2003).
101. Brett, M., Leff, A. P., Rorden, C. & Ashburner, J. Spatial normalization of brain images with focal lesions using cost function masking. *Neuroimage* **14**, 486–500 (2001).
102. Germann, J. *et al.* Untapped Neuroimaging Tools for Neuro-Oncology: Connectomics and Spatial Transcriptomics. *Cancers (Basel)* **14**, 464 (2022).
